# Supplementary material
Source: Springer Nature journal article supplement (https://www.springermedizin.de/resource/supplementary/12985_2010_834_MOESM7_ESM.pdf/9609292)
Supplement: MOESM7 [file 9609292]

| Groups | Vaccine               | Number of positive /total | Protection ratio (%) |
|--------|-----------------------|---------------------------|----------------------|
| 1      | GST-sM2               | 10/10                     | 0                    |
| 2      | GST-C3d-sM2           | 8/10                      | 20                   |
| 3      | GST-C3d-L1-sM2        | 9/10                      | 10                   |
| 4      | GST-C3d-L1-C3d-sM2    | 9/10                      | 10                   |
| 5      | GST-C3d-L1-C3d-L2-sM2 | 7/10                      | 30                   |
| 6      | GST-sM2+IFA           | 7/10                      | 30                   |
